# Supplementary material for: Orchestrating NK and T cells via tri-specific nano-antibodies for synergistic antitumor immunity
Source: PubMed Central journal article supplement (PMC11266419; doi:10.1038/s41467-024-50474-y), 2024-07-23
Supplement: 41467_2024_50474_MOESM3_ESM.pdf [file 41467_2024_50474_MOESM3_ESM.pdf]

## **Description of Additional Supplementary Files**

### **Supplementary Video 1. NK cells treated with Tri-NAb did not harm each other.**

CFSE-labeled NK cells (green) were treated with Tri-NAb (10 µg/mL per mAb), and cell behavior was evaluated within 6 h using the ImageXpress® Micro Confocal High-Content Imaging System (Molecular Devices) to observe whether NK cells were harmed. Before imaging, propidium iodide dye (50 µg/mL) was added to distinguish between living and dead cells (red).

### **Supplementary Video 2. CD8<sup>+</sup> T cells treated with Tri-NAb did not harm each other.**

CFSE-labeled CD8<sup>+</sup> T cells (green) were treated with Tri-NAb (10 µg/mL per mAb), and cell behavior was evaluated within 6 h using the ImageXpress® Micro Confocal High-Content Imaging System (Molecular Devices) to observe whether CD8<sup>+</sup> T cells were harmed. Before imaging, propidium iodide dye (50 µg/mL) was added to distinguish between living and dead cells (red).

### **Supplementary Video 3. The fratricide in NK and CD8<sup>+</sup> T cells did not occur after treatment with Tri-NAb.**

Co-incubated DiD-labeled NK (blue) and CFSE-labeled CD8<sup>+</sup> T cells (green) were treated with Tri-NAb (10 µg/mL per mAb), and cell behavior was evaluated within 6 h using the ImageXpress® Micro Confocal High-Content Imaging System (Molecular Devices) to observe whether binding led to effector cell fratricide. Before imaging, propidium iodide dye (50 µg/mL) was added to distinguish between living and dead cells (red).
